# Supplementary material
Source: publisher site journal article supplement (https://www.dovepress.com/article/216914)
Supplement: Supplementary file 1 [file get_supplementary_file.php]

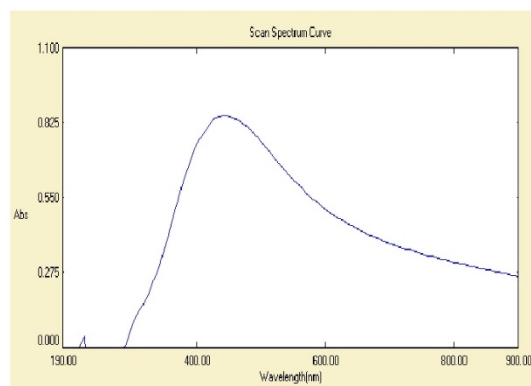

**Figure 1:** UV-Visible spectrum of SeNPs synthesized by using compound (2b) at room temperature.

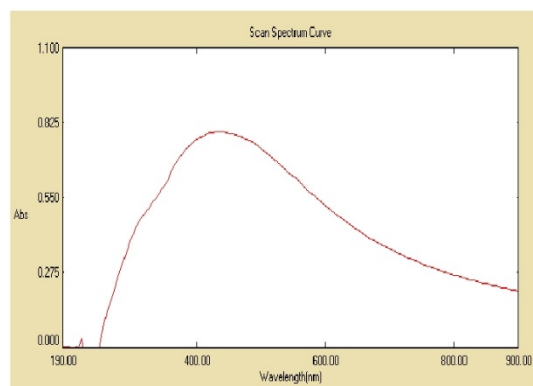

**Figure 2:** UV-Visible spectrum of SeNPs synthesized by using compound (2c) at room temperature.

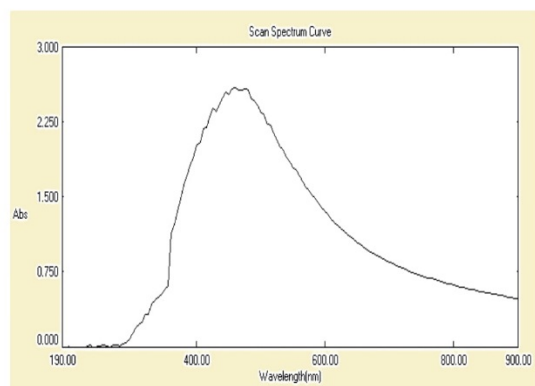

**Figure 3:** UV-Visible spectrum of SeNPs synthesized by using compound (2f) at room temperature.

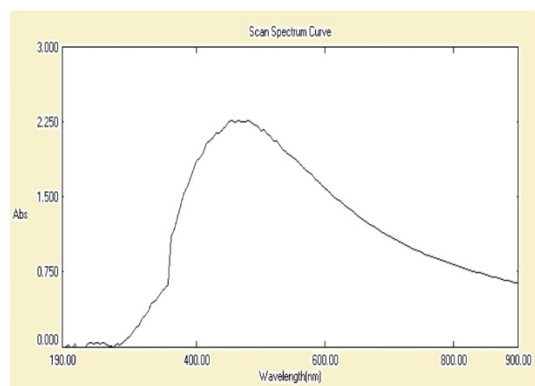

**Figure 4:** UV-Visible spectrum of SeNPs synthesized by using compound (2g) at room temperature.

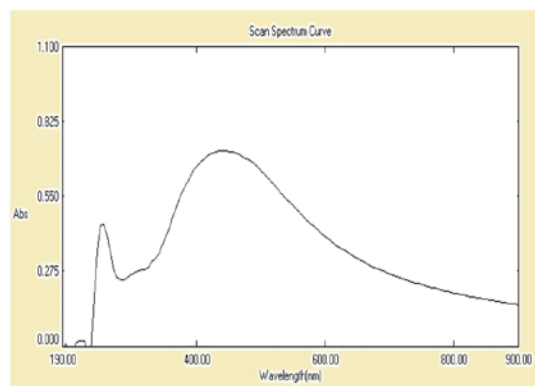

**Figure 5:** UV-Visible spectrum of SeNPs synthesized by using compound (2h) at room temperature.

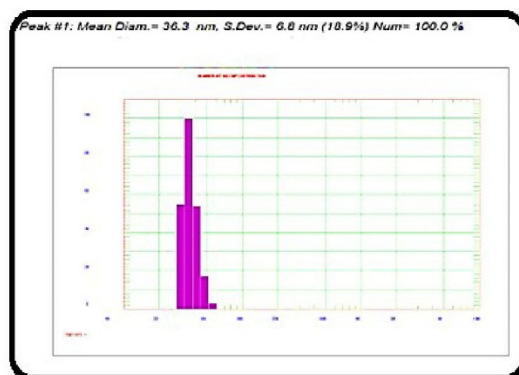

Figure 6: DLS pattern of particle size distribution of the SeNPs synthesized by using compound (2b) at room temperature.

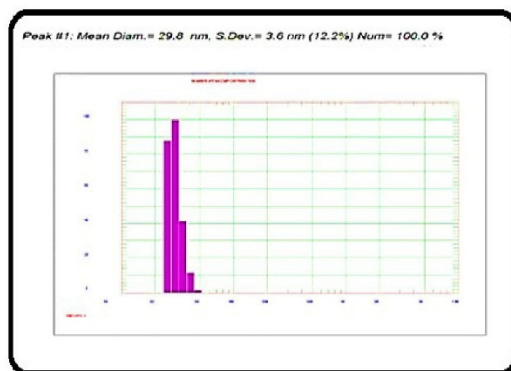

**Figure 7:** DLS pattern of particle size distribution of the SeNPs synthesized by using compound (2c) at room temperature.

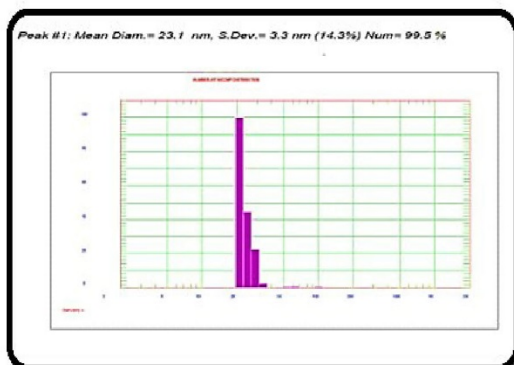

**Figure 8:** DLS pattern of particle size distribution of the SeNPs synthesized by using compound (2f) at room temperature



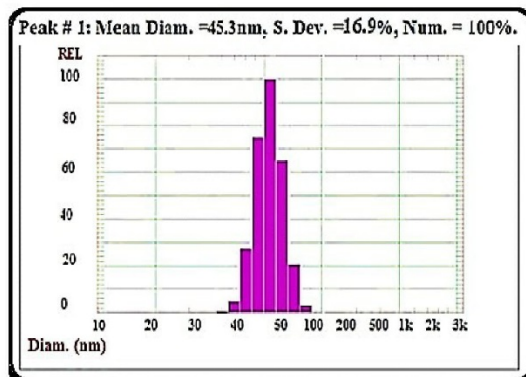

Figure 9: DLS pattern of particle size distribution of the SeNPs synthesized by using compound (2g) at room temperature.

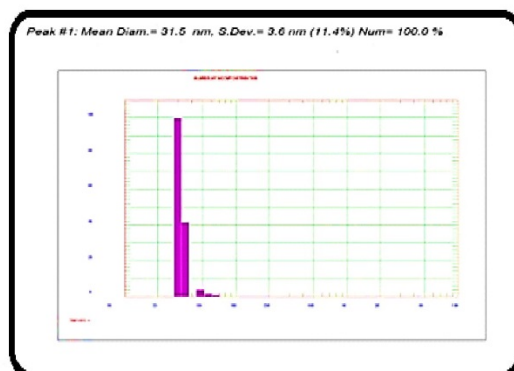

**Figure 10:** DLS pattern of particle size distribution of the SeNPs synthesized by using compound (2h) at room temperature.
